recover Angirasa and Mahajan's conclusion to their first problem, in which the vertical wall was attached to an adiabatic wall.

## References

- Bejan, A., 1984, *Convection Heat Transfer*, Wiley, New York, p. 116.
- Kimura, S., and Bejan, A., 1985a, "Natural Convection in a Differentially Heated Corner Region," *The Physics of Fluids*, Vol. 28, pp. 2980-2989.
- Kimura, S., and Bejan, A., 1985b, "Natural Convection in a Stably Heated Corner Filled With Porous Medium," *ASME JOURNAL OF HEAT TRANSFER*, Vol. 107, pp. 293-298.

## Authors' Closure

We thank Professor Bejan for his thoughtful comments on our work. We agree with him that it is possible to obtain qualitative understanding of the effects studied from scaling theory. The objective of our paper was to provide quantitative results for an important configuration and describe the physics underlying these observed effects. His comment on heat transfer following the path of least resistance in a corner is, in general, valid for all heat transfer processes in different configurations as well.
